# Supplementary material for: Psychobiotic Effects on Anxiety Are Modulated by Lifestyle Behaviors: A Randomized Placebo-Controlled Trial on Healthy Adults
Source: MDPI journal article supplement (doi:10.3390/nu15071706), 2023-03-31
Supplement: s1 [file s1]

**Table S6. Three-way interaction model for healthy behavior in RYFF.**

| <i>Predictors</i>                              | <b>RYFF</b>        |                   |              |                    |           |          |
|------------------------------------------------|--------------------|-------------------|--------------|--------------------|-----------|----------|
|                                                | <i>beta coeff.</i> | <i>Std. Error</i> | <i>CI</i>    | <i>t statistic</i> | <i>df</i> | <i>p</i> |
| (Intercept)                                    | -0.03              | 0.07              | -0.17 – 0.10 | -0.51              | 185.52    | 0.611    |
| Sex [Male]                                     | 0.02               | 0.10              | -0.18 – 0.23 | 0.21               | 129.25    | 0.836    |
| Age                                            | 0.02               | 0.01              | 0.01 – 0.03  | 3.32               | 129.01    | 0.001    |
| Probiotic [Treatment]                          | 0.08               | 0.09              | -0.10 – 0.26 | 0.91               | 192.03    | 0.366    |
| Health                                         | 0.09               | 0.04              | 0.01 – 0.18  | 2.20               | 191.58    | 0.029    |
| Time [Post]                                    | -0.02              | 0.05              | -0.12 – 0.07 | -0.45              | 255.02    | 0.650    |
| Time [fw]                                      | -0.06              | 0.05              | -0.16 – 0.04 | -1.16              | 256.29    | 0.246    |
| Probiotic [Treatment] × Health                 | 0.05               | 0.06              | -0.08 – 0.18 | 0.75               | 192.06    | 0.452    |
| Probiotic [Treatment] × Time [Post]            | 0.02               | 0.07              | -0.12 – 0.16 | 0.26               | 255.02    | 0.795    |
| Probiotic [Treatment] × Time [fw]              | 0.09               | 0.07              | -0.05 – 0.23 | 1.33               | 256.12    | 0.185    |
| Health × Time [Post]                           | -0.04              | 0.03              | -0.10 – 0.03 | -1.11              | 255.02    | 0.270    |
| Health × Time [fw]                             | -0.01              | 0.03              | -0.07 – 0.06 | -0.16              | 255.49    | 0.873    |
| (Probiotic [Treatment] × Health) × Time [Post] | 0.06               | 0.05              | -0.04 – 0.15 | 1.17               | 255.02    | 0.245    |
| (Probiotic [Treatment] × Health) × Time [fw]   | 0.06               | 0.05              | -0.04 – 0.16 | 1.24               | 255.24    | 0.216    |

**Random Effects**

|                                    |               |
|------------------------------------|---------------|
| $\sigma^2$                         | 0.08          |
| $\tau_{00}$ Subject                | 0.20          |
| ICC                                | 0.71          |
| $N$ Subject                        | 135           |
| Observations                       | 398           |
| Marginal $R^2$ / Conditional $R^2$ | 0.174 / 0.759 |

**Table S7. Three-way interaction model for healthy behavior in SWLS.**

| <i>Predictors</i>                   | SWLS               |                   |              |                    |           |          |
|-------------------------------------|--------------------|-------------------|--------------|--------------------|-----------|----------|
|                                     | <i>beta coeff.</i> | <i>Std. Error</i> | <i>CI</i>    | <i>t statistic</i> | <i>df</i> | <i>p</i> |
| (Intercept)                         | -0.14              | 0.43              | -0.99 – 0.70 | -0.33              | 200.04    | 0.740    |
| Sex [Male]                          | -0.52              | 0.64              | -1.78 – 0.74 | -0.81              | 128.94    | 0.417    |
| Age                                 | 0.09               | 0.03              | 0.02 – 0.15  | 2.67               | 128.19    | 0.009    |
| Probiotic [Treatment]               | 0.89               | 0.58              | -0.25 – 2.04 | 1.53               | 210.69    | 0.126    |
| Health                              | 0.62               | 0.27              | 0.09 – 1.15  | 2.31               | 207.55    | 0.022    |
| Time [Post]                         | -0.22              | 0.35              | -0.91 – 0.46 | -0.65              | 249.15    | 0.517    |
| Time [fw]                           | -0.10              | 0.35              | -0.80 – 0.60 | -0.28              | 250.70    | 0.777    |
| Probiotic [Treatment] × Health      | 0.09               | 0.41              | -0.73 – 0.90 | 0.21               | 214.88    | 0.834    |
| Probiotic [Treatment] × Time [Post] | 0.39               | 0.49              | -0.58 – 1.36 | 0.79               | 249.38    | 0.430    |
| Probiotic [Treatment] × Time [fw]   | 0.07               | 0.50              | -0.92 – 1.06 | 0.13               | 252.13    | 0.895    |

|                                                      |               |      |              |       |        |       |
|------------------------------------------------------|---------------|------|--------------|-------|--------|-------|
| Health × Time [Post]                                 | -0.38         | 0.22 | -0.82 – 0.06 | -1.69 | 249.15 | 0.092 |
| Health× Time [fw]                                    | -0.37         | 0.23 | -0.82 – 0.07 | -1.64 | 249.72 | 0.102 |
| (Probiotic [Treatment] × Health) × Time [Post]       | 0.52          | 0.35 | -0.17 – 1.22 | 1.48  | 249.64 | 0.139 |
| (Probiotic [Treatment] × Health) × Time [fw]         | 0.67          | 0.35 | -0.03 – 1.36 | 1.88  | 253.06 | 0.061 |
| <b>Random Effects</b>                                |               |      |              |       |        |       |
| $\sigma^2$                                           | 4.02          |      |              |       |        |       |
| $\tau_{00}$ Subject                                  | 7.28          |      |              |       |        |       |
| ICC                                                  | 0.64          |      |              |       |        |       |
| N <sub>Subject</sub>                                 | 135           |      |              |       |        |       |
| Observations                                         | 392           |      |              |       |        |       |
| Marginal R <sup>2</sup> / Conditional R <sup>2</sup> | 0.129 / 0.690 |      |              |       |        |       |

**Table S8. Three-way interaction model for healthy behavior in STAI.**

| <i>Predictors</i>     | STAI               |                   |               |                    |           |          |
|-----------------------|--------------------|-------------------|---------------|--------------------|-----------|----------|
|                       | <i>beta coeff.</i> | <i>Std. Error</i> | <i>CI</i>     | <i>t statistic</i> | <i>df</i> | <i>p</i> |
| (Intercept)           | 1.04               | 0.92              | -0.78 – 2.86  | 1.12               | 273.38    | 0.263    |
| Sex [Male]            | -1.19              | 1.23              | -3.63 – 1.25  | -0.96              | 129.14    | 0.337    |
| Age                   | -0.15              | 0.06              | -0.28 – -0.02 | -2.30              | 128.45    | 0.023    |
| Probiotic [Treatment] | -1.71              | 1.26              | -4.19 – 0.76  | -1.36              | 286.81    | 0.174    |
| Health                | -1.65              | 0.58              | -2.79 – -0.51 | -2.84              | 285.92    | 0.005    |

|                                                |               |      |               |       |        |       |
|------------------------------------------------|---------------|------|---------------|-------|--------|-------|
| Time [Post]                                    | -0.66         | 0.98 | -2.59 – 1.26  | -0.68 | 253.94 | 0.498 |
| Time [fw]                                      | 0.31          | 0.99 | -1.64 – 2.27  | 0.31  | 256.04 | 0.754 |
| Probiotic [Treatment] × Health                 | -0.02         | 0.89 | -1.76 – 1.72  | -0.02 | 286.87 | 0.981 |
| Probiotic [Treatment] × Time [Post]            | 1.52          | 1.38 | -1.20 – 4.23  | 1.10  | 253.99 | 0.272 |
| Probiotic [Treatment] × Time [fw]              | -0.31         | 1.40 | -3.05 – 2.44  | -0.22 | 255.65 | 0.827 |
| Health × Time [Post]                           | 0.59          | 0.65 | -0.68 – 1.86  | 0.92  | 256.38 | 0.359 |
| Health × Time [fw]                             | 1.08          | 0.64 | -0.17 – 2.33  | 1.70  | 254.22 | 0.090 |
| (Probiotic [Treatment] × Health) × Time [Post] | -2.68         | 0.99 | -4.64 – -0.73 | -2.70 | 257.23 | 0.007 |
| (Probiotic [Treatment] × Health) × Time [fw]   | -1.90         | 0.97 | -3.80 – 0.01  | -1.96 | 253.66 | 0.051 |
| <b>Random Effects</b>                          |               |      |               |       |        |       |
| $\sigma^2$                                     | 31.71         |      |               |       |        |       |
| $\tau_{00}$ Subject                            | 21.67         |      |               |       |        |       |
| ICC                                            | 0.41          |      |               |       |        |       |
| $N$ Subject                                    | 135           |      |               |       |        |       |
| Observations                                   | 396           |      |               |       |        |       |
| Marginal $R^2$ / Conditional $R^2$             | 0.169 / 0.506 |      |               |       |        |       |

**Table S9. Three-way interaction model for healthy behavior in DERS.**

| <i>Predictors</i>                              | <b>DERS</b>        |                   |               |                    |           |          |
|------------------------------------------------|--------------------|-------------------|---------------|--------------------|-----------|----------|
|                                                | <i>beta coeff.</i> | <i>Std. Error</i> | <i>CI</i>     | <i>t statistic</i> | <i>df</i> | <i>p</i> |
| (Intercept)                                    | 0.16               | 1.27              | -2.34 – 2.67  | 0.13               | 217.80    | 0.898    |
| Sex [Male]                                     | -1.55              | 1.84              | -5.18 – 2.08  | -0.84              | 128.55    | 0.400    |
| Age                                            | -0.36              | 0.10              | -0.55 – -0.17 | -3.70              | 128.70    | <0.001   |
| Probiotic [Treatment]                          | -0.86              | 1.72              | -4.24 – 2.53  | -0.50              | 227.54    | 0.619    |
| Health                                         | -1.61              | 0.79              | -3.17 – -0.05 | -2.04              | 224.61    | 0.043    |
| Time [Post]                                    | 0.42               | 1.11              | -1.77 – 2.61  | 0.38               | 249.99    | 0.705    |
| Time [fw]                                      | 0.05               | 1.14              | -2.19 – 2.29  | 0.05               | 251.87    | 0.963    |
| Probiotic [Treatment] × Health                 | -0.27              | 1.21              | -2.65 – 2.11  | -0.23              | 226.36    | 0.821    |
| Probiotic [Treatment] × Time [Post]            | 0.22               | 1.57              | -2.88 – 3.32  | 0.14               | 250.31    | 0.888    |
| Probiotic [Treatment] × Time [fw]              | 0.57               | 1.59              | -2.57 – 3.71  | 0.36               | 251.42    | 0.721    |
| Health × Time [Post]                           | 0.54               | 0.71              | -0.87 – 1.94  | 0.75               | 249.18    | 0.454    |
| Health × Time [fw]                             | 0.36               | 0.72              | -1.06 – 1.79  | 0.50               | 250.09    | 0.615    |
| (Probiotic [Treatment] × Health) × Time [Post] | -2.75              | 1.11              | -4.95 – -0.56 | -2.47              | 250.87    | 0.014    |
| (Probiotic [Treatment] × Health) × Time [fw]   | -1.98              | 1.10              | -4.14 – 0.19  | -1.80              | 249.77    | 0.074    |

## Random Effects

|                                    |               |
|------------------------------------|---------------|
| $\sigma^2$                         | 40.56         |
| $\tau_{00 \text{ Subject}}$        | 58.12         |
| ICC                                | 0.59          |
| $N_{\text{Subject}}$               | 135           |
| Observations                       | 392           |
| Marginal $R^2$ / Conditional $R^2$ | 0.176 / 0.661 |

**Table S10. Three-way interaction model for healthy behavior in PANAS\_POS.**

| <i>Predictors</i>                       | PANAS_POS          |                   |              |                    |           |          |
|-----------------------------------------|--------------------|-------------------|--------------|--------------------|-----------|----------|
|                                         | <i>beta coeff.</i> | <i>Std. Error</i> | <i>CI</i>    | <i>t statistic</i> | <i>df</i> | <i>p</i> |
| (Intercept)                             | -0.56              | 0.80              | -2.13 – 1.01 | -0.70              | 293.46    | 0.484    |
| Sex [Male]                              | 1.21               | 1.03              | -0.83 – 3.25 | 1.17               | 129.20    | 0.242    |
| Age                                     | 0.07               | 0.05              | -0.03 – 0.18 | 1.39               | 128.69    | 0.167    |
| Probiotic [Treatment]                   | 0.82               | 1.09              | -1.32 – 2.96 | 0.75               | 307.31    | 0.454    |
| Health                                  | 0.93               | 0.50              | -0.05 – 1.92 | 1.86               | 306.40    | 0.064    |
| Time [Post]                             | -0.51              | 0.89              | -2.25 – 1.24 | -0.57              | 255.80    | 0.568    |
| Time [fw]                               | -0.30              | 0.90              | -2.07 – 1.47 | -0.33              | 258.20    | 0.743    |
| Probiotic [Treatment] ××<br>Health      | 1.97               | 0.77              | 0.47 – 3.48  | 2.58               | 307.37    | 0.010    |
| Probiotic [Treatment] ××<br>Time [Post] | 1.06               | 1.24              | -1.39 – 3.51 | 0.85               | 255.07    | 0.395    |

|                                                   |       |      |              |       |        |       |
|---------------------------------------------------|-------|------|--------------|-------|--------|-------|
| Probiotic [Treatment] ××<br>Time [fw]             | 0.17  | 1.26 | -2.32 – 2.66 | 0.13  | 257.45 | 0.895 |
| Health × Time [Post]                              | 0.71  | 0.57 | -0.43 – 1.84 | 1.23  | 256.10 | 0.220 |
| Health × Time [fw]                                | 0.06  | 0.58 | -1.08 – 1.19 | 0.10  | 256.31 | 0.921 |
| (Probiotic [Treatment] ×<br>Health) × Time [Post] | -0.32 | 0.88 | -2.05 – 1.40 | -0.37 | 255.09 | 0.714 |
| (Probiotic [Treatment] ×<br>Health) × Time [fw]   | 0.01  | 0.88 | -1.72 – 1.74 | 0.01  | 255.23 | 0.989 |

#### Random Effects

|                                                      |               |
|------------------------------------------------------|---------------|
| $\sigma^2$                                           | 25.99         |
| $\tau_{00}$ Subject                                  | 13.86         |
| ICC                                                  | 0.35          |
| N <sub>Subject</sub>                                 | 135           |
| Observations                                         | 397           |
| Marginal R <sup>2</sup> / Conditional R <sup>2</sup> | 0.227 / 0.496 |

**Table S11. Three-way interaction model for healthy behavior in PANAS\_NEG.**

| <i>Predictors</i> | PANAS_NEG          |                   |               |                    |           |          |
|-------------------|--------------------|-------------------|---------------|--------------------|-----------|----------|
|                   | <i>beta coeff.</i> | <i>Std. Error</i> | <i>CI</i>     | <i>t statistic</i> | <i>df</i> | <i>p</i> |
| (Intercept)       | 1.23               | 0.95              | -0.65 – 3.12  | 1.29               | 206.55    | 0.197    |
| Sex [Male]        | -0.80              | 1.40              | -3.57 – 1.97  | -0.57              | 128.32    | 0.567    |
| Age               | -0.21              | 0.07              | -0.36 – -0.07 | -2.93              | 128.82    | 0.004    |

|                                                   |       |      |               |       |        |        |
|---------------------------------------------------|-------|------|---------------|-------|--------|--------|
| Probiotic [Treatment]                             | -3.35 | 1.29 | -5.90 – -0.81 | -2.60 | 216.08 | 0.010  |
| Health                                            | -2.76 | 0.60 | -3.94 – -1.59 | -4.62 | 216.83 | <0.001 |
| Time [Post]                                       | -0.81 | 0.79 | -2.37 – 0.74  | -1.03 | 248.17 | 0.305  |
| Time [fw]                                         | -1.26 | 0.81 | -2.86 – 0.34  | -1.55 | 251.57 | 0.122  |
| Probiotic [Treatment] ××<br>Health                | 1.94  | 0.91 | 0.15 – 3.74   | 2.14  | 216.42 | 0.034  |
| Probiotic [Treatment] ×<br>Time [Post]            | 2.00  | 1.12 | -0.20 – 4.20  | 1.79  | 248.57 | 0.075  |
| Probiotic [Treatment] ×<br>Time [fw]              | 3.17  | 1.14 | 0.93 – 5.42   | 2.79  | 251.21 | 0.006  |
| Health × Time [Post]                              | 1.39  | 0.52 | 0.38 – 2.41   | 2.70  | 248.17 | 0.007  |
| Health × Time [fw]                                | 1.66  | 0.52 | 0.63 – 2.68   | 3.18  | 251.30 | 0.002  |
| (Probiotic [Treatment] ×<br>Health) × Time [Post] | -2.15 | 0.79 | -3.70 – -0.60 | -2.73 | 248.22 | 0.007  |
| (Probiotic [Treatment] ×<br>Health) × Time [fw]   | -1.42 | 0.79 | -2.98 – 0.13  | -1.80 | 250.35 | 0.073  |

#### Random Effects

|                                    |               |
|------------------------------------|---------------|
| $\sigma^2$                         | 20.58         |
| $\tau_{00}$ Subject                | 34.82         |
| ICC                                | 0.63          |
| N Subject                          | 135           |
| Observations                       | 391           |
| Marginal $R^2$ / Conditional $R^2$ | 0.154 / 0.686 |



**Table S12. Three-way interaction model for healthy behavior in SF36\_MEN.**

| <i>Predictors</i>                              | <b>SF36_MEN</b>    |                   |               |                    |           |          |
|------------------------------------------------|--------------------|-------------------|---------------|--------------------|-----------|----------|
|                                                | <i>beta coeff.</i> | <i>Std. Error</i> | <i>CI</i>     | <i>t statistic</i> | <i>df</i> | <i>p</i> |
| (Intercept)                                    | -1.47              | 1.73              | -4.89 – 1.94  | -0.85              | 230.92    | 0.397    |
| Sex [Male]                                     | 4.17               | 2.46              | -0.70 – 9.04  | 1.69               | 129.09    | 0.093    |
| Age                                            | 0.42               | 0.13              | 0.17 – 0.68   | 3.30               | 128.74    | 0.001    |
| Probiotic [Treatment]                          | 1.56               | 2.35              | -3.07 – 6.19  | 0.66               | 241.84    | 0.508    |
| Health                                         | 4.96               | 1.08              | 2.82 – 7.10   | 4.57               | 241.10    | <0.001   |
| Time [Post]                                    | -0.60              | 1.61              | -3.77 – 2.57  | -0.37              | 253.60    | 0.710    |
| Time [fw]                                      | 0.02               | 1.64              | -3.20 – 3.24  | 0.01               | 255.20    | 0.992    |
| Probiotic [Treatment] × Health                 | -0.20              | 1.65              | -3.46 – 3.06  | -0.12              | 241.89    | 0.906    |
| Probiotic [Treatment] × Time [Post]            | 0.79               | 2.27              | -3.67 – 5.26  | 0.35               | 253.59    | 0.727    |
| Probiotic [Treatment] × Time [fw]              | -0.58              | 2.30              | -5.10 – 3.95  | -0.25              | 254.92    | 0.801    |
| Health × Time [Post]                           | -2.03              | 1.04              | -4.07 – 0.02  | -1.95              | 253.09    | 0.052    |
| Health × Time [fw]                             | -2.57              | 1.05              | -4.63 – -0.51 | -2.46              | 253.86    | 0.015    |
| (Probiotic [Treatment] × Health) × Time [Post] | 1.84               | 1.59              | -1.29 – 4.96  | 1.16               | 253.09    | 0.248    |
| (Probiotic [Treatment] ×                       | 1.01               | 1.59              | -2.13 – 4.14  | 0.63               | 253.45    | 0.529    |

Health) × Time [fw]

### Random Effects

|                                    |               |
|------------------------------------|---------------|
| $\sigma^2$                         | 85.82         |
| $\tau_{00}$ Subject                | 100.33        |
| ICC                                | 0.54          |
| $N_{\text{Subject}}$               | 135           |
| Observations                       | 396           |
| Marginal $R^2$ / Conditional $R^2$ | 0.213 / 0.637 |

**Table S13. Three-way interaction model for healthy behavior in SF36\_PHY.**

| <i>Predictors</i>              | <b>SF36_PHY</b>    |                   |              |                    |           |          |
|--------------------------------|--------------------|-------------------|--------------|--------------------|-----------|----------|
|                                | <i>beta coeff.</i> | <i>Std. Error</i> | <i>CI</i>    | <i>t statistic</i> | <i>df</i> | <i>p</i> |
| (Intercept)                    | 0.30               | 1.12              | -1.91 – 2.52 | 0.27               | 216.58    | 0.787    |
| Sex [Male]                     | 2.04               | 1.63              | -1.18 – 5.26 | 1.25               | 128.37    | 0.213    |
| Age                            | 0.03               | 0.08              | -0.13 – 0.20 | 0.39               | 127.56    | 0.698    |
| Probiotic [Treatment]          | 0.99               | 1.53              | -2.04 – 4.01 | 0.64               | 230.51    | 0.521    |
| Health                         | 3.16               | 0.70              | 1.77 – 4.55  | 4.49               | 227.61    | <0.001   |
| Time [Post]                    | -0.54              | 0.99              | -2.50 – 1.41 | -0.55              | 245.56    | 0.583    |
| Time [fw]                      | 0.02               | 1.01              | -1.96 – 2.01 | 0.02               | 246.95    | 0.982    |
| Probiotic [Treatment] × Health | -0.33              | 1.08              | -2.46 – 1.80 | -0.30              | 231.70    | 0.762    |

|                                                |       |      |               |       |        |       |
|------------------------------------------------|-------|------|---------------|-------|--------|-------|
| Probiotic [Treatment] × Time [Post]            | -0.42 | 1.41 | -3.20 – 2.36  | -0.30 | 246.32 | 0.768 |
| Probiotic [Treatment] × Time [fw]              | -2.47 | 1.42 | -5.28 – 0.33  | -1.74 | 247.65 | 0.084 |
| Health × Time [Post]                           | -1.36 | 0.64 | -2.63 – -0.10 | -2.12 | 245.67 | 0.035 |
| Health × Time [fw]                             | -1.14 | 0.66 | -2.43 – 0.15  | -1.74 | 247.47 | 0.084 |
| (Probiotic [Treatment] × Health) × Time [Post] | 1.69  | 1.00 | -0.28 – 3.66  | 1.69  | 247.27 | 0.092 |
| (Probiotic [Treatment] × Health) × Time [fw]   | 2.02  | 1.00 | 0.06 – 3.98   | 2.03  | 246.69 | 0.043 |

#### Random Effects

|                                                      |               |
|------------------------------------------------------|---------------|
| $\sigma^2$                                           | 31.86         |
| $\tau_{00}$ Subject                                  | 45.48         |
| ICC                                                  | 0.59          |
| N <sub>Subject</sub>                                 | 135           |
| Observations                                         | 387           |
| Marginal R <sup>2</sup> / Conditional R <sup>2</sup> | 0.191 / 0.667 |

**Table S14. Three-way interaction model for healthy behavior in MAIA.**

| <i>Predictors</i>                              | <b>MAIA</b>        |                   |              |                    |           |          |
|------------------------------------------------|--------------------|-------------------|--------------|--------------------|-----------|----------|
|                                                | <i>beta coeff.</i> | <i>Std. Error</i> | <i>CI</i>    | <i>t statistic</i> | <i>df</i> | <i>p</i> |
| (Intercept)                                    | -0.05              | 0.08              | -0.22 – 0.11 | -0.65              | 185.90    | 0.517    |
| Sex [Male]                                     | 0.03               | 0.13              | -0.22 – 0.28 | 0.23               | 128.99    | 0.820    |
| Age                                            | 0.00               | 0.01              | -0.01 – 0.02 | 0.76               | 128.85    | 0.448    |
| Probiotic [Treatment]                          | 0.06               | 0.11              | -0.16 – 0.28 | 0.54               | 193.68    | 0.591    |
| Health                                         | 0.11               | 0.05              | 0.01 – 0.21  | 2.13               | 192.02    | 0.034    |
| Time [Post]                                    | -0.01              | 0.06              | -0.13 – 0.11 | -0.18              | 252.34    | 0.861    |
| Time [fw]                                      | -0.06              | 0.06              | -0.19 – 0.06 | -1.04              | 253.30    | 0.298    |
| Probiotic [Treatment] × Health                 | 0.27               | 0.08              | 0.11 – 0.42  | 3.36               | 200.33    | 0.001    |
| Probiotic [Treatment] × Time [Post]            | 0.07               | 0.09              | -0.10 – 0.24 | 0.82               | 252.65    | 0.414    |
| Probiotic [Treatment] × Time [fw]              | 0.19               | 0.09              | 0.02 – 0.37  | 2.21               | 253.35    | 0.028    |
| Health × Time [Post]                           | -0.06              | 0.04              | -0.13 – 0.02 | -1.46              | 252.04    | 0.146    |
| Health × Time [fw]                             | -0.01              | 0.04              | -0.09 – 0.06 | -0.35              | 252.50    | 0.726    |
| (Probiotic [Treatment] × Health) × Time [Post] | -0.08              | 0.06              | -0.20 – 0.05 | -1.23              | 254.65    | 0.219    |
| (Probiotic [Treatment] × Health) × Time [fw]   | -0.09              | 0.06              | -0.21 – 0.03 | -1.41              | 253.50    | 0.160    |

## Random Effects

|                                    |               |
|------------------------------------|---------------|
| $\sigma^2$                         | 0.12          |
| $\tau_{00 \text{ Subject}}$        | 0.29          |
| ICC                                | 0.70          |
| $N_{\text{Subject}}$               | 135           |
| Observations                       | 395           |
| Marginal $R^2$ / Conditional $R^2$ | 0.191 / 0.761 |

**Table S15. Three-way interaction model for healthy behavior in FFMQ.**

| <i>Predictors</i>                   | FFMQ               |                   |              |                    |           |          |
|-------------------------------------|--------------------|-------------------|--------------|--------------------|-----------|----------|
|                                     | <i>beta coeff.</i> | <i>Std. Error</i> | <i>CI</i>    | <i>t statistic</i> | <i>df</i> | <i>p</i> |
| (Intercept)                         | -1.04              | 2.29              | -5.55 – 3.47 | -0.45              | 185.04    | 0.650    |
| Sex [Male]                          | 2.14               | 3.48              | -4.74 – 9.02 | 0.62               | 128.98    | 0.539    |
| Age                                 | 0.38               | 0.18              | 0.02 – 0.74  | 2.11               | 128.77    | 0.037    |
| Probiotic [Treatment]               | 1.44               | 3.08              | -4.63 – 7.51 | 0.47               | 190.48    | 0.640    |
| Health                              | 4.67               | 1.43              | 1.84 – 7.49  | 3.25               | 196.01    | 0.001    |
| Time [Post]                         | -0.23              | 1.66              | -3.50 – 3.04 | -0.14              | 252.63    | 0.889    |
| Time [fw]                           | -0.22              | 1.69              | -3.54 – 3.11 | -0.13              | 253.55    | 0.899    |
| Probiotic [Treatment] × Health      | 1.26               | 2.17              | -3.03 – 5.55 | 0.58               | 192.55    | 0.563    |
| Probiotic [Treatment] × Time [Post] | 0.16               | 2.33              | -4.44 – 4.75 | 0.07               | 252.48    | 0.946    |

|                                                |       |      |              |       |        |       |
|------------------------------------------------|-------|------|--------------|-------|--------|-------|
| Probiotic [Treatment] × Time [fw]              | 0.75  | 2.37 | -3.91 – 5.41 | 0.32  | 253.24 | 0.752 |
| Health × Time [Post]                           | -1.98 | 1.09 | -4.12 – 0.16 | -1.83 | 253.13 | 0.069 |
| Health × Time [fw]                             | -1.36 | 1.10 | -3.51 – 0.80 | -1.24 | 253.58 | 0.217 |
| (Probiotic [Treatment] × Health) × Time [Post] | 3.93  | 1.64 | 0.70 – 7.17  | 2.39  | 252.51 | 0.017 |
| (Probiotic [Treatment] × Health) × Time [fw]   | 3.49  | 1.65 | 0.24 – 6.74  | 2.11  | 252.73 | 0.035 |

#### Random Effects

|                                    |               |
|------------------------------------|---------------|
| $\sigma^2$                         | 90.30         |
| $\tau_{00}$ Subject                | 227.46        |
| ICC                                | 0.72          |
| $N_{\text{Subject}}$               | 135           |
| Observations                       | 395           |
| Marginal $R^2$ / Conditional $R^2$ | 0.198 / 0.772 |

**Table S16. Three-way interaction model for risky behavior in RYFF.**

| <i>Predictors</i> | RYFF               |                   |              |                    |           |          |
|-------------------|--------------------|-------------------|--------------|--------------------|-----------|----------|
|                   | <i>beta coeff.</i> | <i>Std. Error</i> | <i>CI</i>    | <i>t statistic</i> | <i>df</i> | <i>p</i> |
| (Intercept)       | -0.05              | 0.07              | -0.19 – 0.09 | -0.70              | 183.42    | 0.483    |
| Sex [Male]        | 0.05               | 0.11              | -0.16 – 0.26 | 0.45               | 129.06    | 0.656    |
| Age               | 0.02               | 0.01              | 0.01 – 0.03  | 3.15               | 128.87    | 0.002    |

|                                                      |               |      |               |       |        |       |
|------------------------------------------------------|---------------|------|---------------|-------|--------|-------|
| Probiotic [Treatment]                                | 0.11          | 0.09 | -0.08 – 0.29  | 1.16  | 190.69 | 0.247 |
| Risk                                                 | -0.13         | 0.05 | -0.24 – -0.03 | -2.47 | 189.69 | 0.015 |
| Time [Post]                                          | -0.02         | 0.05 | -0.12 – 0.08  | -0.43 | 253.03 | 0.666 |
| Time [fw]                                            | -0.06         | 0.05 | -0.16 – 0.04  | -1.14 | 254.18 | 0.257 |
| Probiotic [Treatment] × Risk                         | 0.07          | 0.07 | -0.07 – 0.20  | 0.95  | 190.35 | 0.344 |
| Probiotic [Treatment] × Time [Post]                  | 0.01          | 0.07 | -0.13 – 0.15  | 0.18  | 253.29 | 0.859 |
| Probiotic [Treatment] × Time [fw]                    | 0.09          | 0.07 | -0.05 – 0.23  | 1.28  | 254.21 | 0.203 |
| Risk × Time [Post]                                   | 0.01          | 0.04 | -0.07 – 0.09  | 0.16  | 253.03 | 0.874 |
| Risk × Time [fw]                                     | -0.02         | 0.04 | -0.10 – 0.07  | -0.39 | 254.47 | 0.700 |
| (Probiotic [Treatment] × Risk) × Time [Post]         | 0.02          | 0.05 | -0.08 – 0.13  | 0.42  | 254.31 | 0.672 |
| (Probiotic [Treatment] × Risk) × Time [fw]           | 0.00          | 0.05 | -0.10 – 0.11  | 0.02  | 254.69 | 0.984 |
| <b>Random Effects</b>                                |               |      |               |       |        |       |
| $\sigma^2$                                           | 0.08          |      |               |       |        |       |
| $\tau_{00}$ Subject                                  | 0.21          |      |               |       |        |       |
| ICC                                                  | 0.72          |      |               |       |        |       |
| N Subject                                            | 135           |      |               |       |        |       |
| Observations                                         | 396           |      |               |       |        |       |
| Marginal R <sup>2</sup> / Conditional R <sup>2</sup> | 0.133 / 0.754 |      |               |       |        |       |

**Table S17. Three-way interaction model for risky behavior in SWLS.**

| <i>Predictors</i>                            | SWLS               |                   |              |                    |           |          |
|----------------------------------------------|--------------------|-------------------|--------------|--------------------|-----------|----------|
|                                              | <i>beta coeff.</i> | <i>Std. Error</i> | <i>CI</i>    | <i>t statistic</i> | <i>df</i> | <i>p</i> |
| (Intercept)                                  | -0.20              | 0.44              | -1.07 – 0.66 | -0.46              | 197.01    | 0.643    |
| Sex [Male]                                   | -0.41              | 0.66              | -1.71 – 0.89 | -0.62              | 128.88    | 0.535    |
| Age                                          | 0.09               | 0.03              | 0.02 – 0.16  | 2.63               | 128.27    | 0.010    |
| Probiotic [Treatment]                        | 0.97               | 0.60              | -0.21 – 2.15 | 1.62               | 207.02    | 0.106    |
| Risk                                         | -0.53              | 0.35              | -1.22 – 0.15 | -1.53              | 204.75    | 0.127    |
| Time [Post]                                  | -0.22              | 0.35              | -0.91 – 0.47 | -0.62              | 249.14    | 0.535    |
| Time [fw]                                    | -0.08              | 0.36              | -0.79 – 0.62 | -0.24              | 250.55    | 0.814    |
| Probiotic [Treatment] × Risk                 | 0.42               | 0.44              | -0.45 – 1.29 | 0.95               | 206.58    | 0.344    |
| Probiotic [Treatment] × Time [Post]          | 0.40               | 0.50              | -0.59 – 1.38 | 0.79               | 249.32    | 0.428    |
| Probiotic [Treatment] × Time [fw]            | 0.08               | 0.51              | -0.92 – 1.07 | 0.15               | 251.67    | 0.882    |
| Risk × Time [Post]                           | 0.03               | 0.29              | -0.53 – 0.60 | 0.12               | 249.14    | 0.906    |
| Risk × Time [fw]                             | -0.13              | 0.30              | -0.71 – 0.45 | -0.44              | 250.91    | 0.658    |
| (Probiotic [Treatment] × Risk) × Time [Post] | 0.02               | 0.37              | -0.70 – 0.74 | 0.05               | 249.15    | 0.960    |
| (Probiotic [Treatment] × Risk) × Time [fw]   | 0.08               | 0.38              | -0.68 – 0.83 | 0.20               | 253.17    | 0.843    |



Risk) × Time [fw]

### Random Effects

|                                    |               |
|------------------------------------|---------------|
| $\sigma^2$                         | 4.09          |
| $\tau_{00}$ Subject                | 7.82          |
| ICC                                | 0.66          |
| $N_{\text{Subject}}$               | 135           |
| Observations                       | 392           |
| Marginal $R^2$ / Conditional $R^2$ | 0.082 / 0.685 |

**Table S18. Three-way interaction model for risky behavior in STAI.**

| <i>Predictors</i>            | STAI               |                   |               |                    |           |          |
|------------------------------|--------------------|-------------------|---------------|--------------------|-----------|----------|
|                              | <i>beta coeff.</i> | <i>Std. Error</i> | <i>CI</i>     | <i>t statistic</i> | <i>df</i> | <i>p</i> |
| (Intercept)                  | 1.24               | 0.96              | -0.66 – 3.14  | 1.29               | 262.20    | 0.200    |
| Sex [Male]                   | -1.67              | 1.31              | -4.26 – 0.92  | -1.28              | 129.24    | 0.203    |
| Age                          | -0.14              | 0.07              | -0.27 – -0.00 | -2.02              | 128.82    | 0.045    |
| Probiotic [Treatment]        | -1.77              | 1.31              | -4.36 – 0.82  | -1.35              | 276.26    | 0.179    |
| Risk                         | 1.50               | 0.77              | -0.01 – 3.01  | 1.96               | 275.15    | 0.051    |
| Time [Post]                  | -0.38              | 0.98              | -2.31 – 1.56  | -0.38              | 254.12    | 0.703    |
| Time [fw]                    | 0.26               | 1.00              | -1.71 – 2.24  | 0.26               | 256.65    | 0.795    |
| Probiotic [Treatment] × Risk | -0.02              | 0.99              | -1.97 – 1.93  | -0.02              | 286.05    | 0.983    |

|                                                      |               |      |              |       |        |       |
|------------------------------------------------------|---------------|------|--------------|-------|--------|-------|
| Probiotic [Treatment] × Time [Post]                  | 0.74          | 1.39 | -1.99 – 3.48 | 0.53  | 254.39 | 0.593 |
| Probiotic [Treatment] × Time [fw]                    | -0.56         | 1.41 | -3.34 – 2.22 | -0.39 | 256.63 | 0.693 |
| Risk × Time [Post]                                   | 0.49          | 0.81 | -1.11 – 2.08 | 0.60  | 254.12 | 0.547 |
| Risk × Time [fw]                                     | 0.27          | 0.83 | -1.36 – 1.90 | 0.33  | 257.29 | 0.745 |
| (Probiotic [Treatment] × Risk) × Time [Post]         | -1.04         | 1.04 | -3.09 – 1.01 | -1.00 | 256.62 | 0.320 |
| (Probiotic [Treatment] × Risk) × Time [fw]           | 0.19          | 1.07 | -1.92 – 2.30 | 0.18  | 260.42 | 0.858 |
| <b>Random Effects</b>                                |               |      |              |       |        |       |
| $\sigma^2$                                           | 32.30         |      |              |       |        |       |
| $\tau_{00}$ Subject                                  | 25.52         |      |              |       |        |       |
| ICC                                                  | 0.44          |      |              |       |        |       |
| N <sub>Subject</sub>                                 | 135           |      |              |       |        |       |
| Observations                                         | 397           |      |              |       |        |       |
| Marginal R <sup>2</sup> / Conditional R <sup>2</sup> | 0.116 / 0.506 |      |              |       |        |       |

**Table S19. Three-way interaction model for risky behavior in DERS.**

| <i>Predictors</i>                             | <b>DERS</b>        |                   |               |                    |           |          |
|-----------------------------------------------|--------------------|-------------------|---------------|--------------------|-----------|----------|
|                                               | <i>beta coeff.</i> | <i>Std. Error</i> | <i>CI</i>     | <i>t statistic</i> | <i>df</i> | <i>p</i> |
| (Intercept)                                   | 0.32               | 1.29              | -2.22 – 2.87  | 0.25               | 208.93    | 0.802    |
| Sexo [Male]                                   | -2.09              | 1.89              | -5.82 – 1.64  | -1.11              | 128.16    | 0.269    |
| Edad                                          | -0.36              | 0.10              | -0.55 – -0.16 | -3.60              | 128.30    | <0.001   |
| Probiotico [Treatment]                        | -1.28              | 1.75              | -4.73 – 2.17  | -0.73              | 219.96    | 0.466    |
| Risk                                          | 0.51               | 1.02              | -1.50 – 2.51  | 0.50               | 215.72    | 0.618    |
| Time [Post]                                   | 0.48               | 1.09              | -1.67 – 2.62  | 0.44               | 248.04    | 0.662    |
| Time [fw]                                     | 0.10               | 1.11              | -2.09 – 2.29  | 0.09               | 249.69    | 0.931    |
| Probiotico [Treatment] × Risk                 | 1.78               | 1.31              | -0.81 – 4.37  | 1.35               | 227.98    | 0.177    |
| Probiotico [Treatment] × Time [Post]          | 0.13               | 1.54              | -2.91 – 3.17  | 0.09               | 247.81    | 0.932    |
| Probiotico [Treatment] × Time [fw]            | 0.57               | 1.57              | -2.52 – 3.66  | 0.36               | 250.34    | 0.717    |
| Risk × Time [Post]                            | 0.84               | 0.89              | -0.92 – 2.59  | 0.94               | 247.52    | 0.349    |
| Risk × Time [fw]                              | 1.28               | 0.93              | -0.55 – 3.10  | 1.38               | 250.37    | 0.169    |
| (Probiotico [Treatment] × Risk) × Time [Post] | -1.25              | 1.17              | -3.55 – 1.04  | -1.07              | 247.73    | 0.283    |
| (Probiotico [Treatment] × Risk) × Time [fw]   | -1.38              | 1.20              | -3.74 – 0.99  | -1.15              | 255.86    | 0.253    |

## Random Effects

|                                    |               |
|------------------------------------|---------------|
| $\sigma^2$                         | 38.84         |
| $\tau_{00}$ Subject                | 62.77         |
| ICC                                | 0.62          |
| $N_{\text{Subject}}$               | 135           |
| Observations                       | 390           |
| Marginal $R^2$ / Conditional $R^2$ | 0.136 / 0.670 |

**Table S20. Three-way interaction model for risky behavior in PANAS\_POS.**

| <i>Predictors</i>            | PANAS_POS          |                   |              |                    |           |          |
|------------------------------|--------------------|-------------------|--------------|--------------------|-----------|----------|
|                              | <i>beta coeff.</i> | <i>Std. Error</i> | <i>CI</i>    | <i>t statistic</i> | <i>df</i> | <i>p</i> |
| (Intercept)                  | -0.43              | 0.88              | -2.16 – 1.30 | -0.49              | 257.76    | 0.625    |
| Sex [Male]                   | 1.58               | 1.19              | -0.77 – 3.94 | 1.33               | 128.48    | 0.186    |
| Age                          | 0.09               | 0.06              | -0.04 – 0.21 | 1.40               | 128.48    | 0.165    |
| Probiotic [Treatment]        | 0.73               | 1.19              | -1.62 – 3.07 | 0.61               | 269.48    | 0.543    |
| Risk                         | 0.38               | 0.72              | -1.05 – 1.80 | 0.52               | 285.00    | 0.602    |
| Time [Post]                  | -0.68              | 0.89              | -2.42 – 1.07 | -0.76              | 252.62    | 0.447    |
| Time [fw]                    | -0.58              | 0.90              | -2.35 – 1.18 | -0.65              | 255.83    | 0.516    |
| Probiotic [Treatment] × Risk | -1.54              | 0.92              | -3.34 – 0.27 | -1.68              | 288.30    | 0.095    |
| Probiotic [Treatment] ×      | 1.30               | 1.24              | -1.14 – 3.75 | 1.05               | 252.24    | 0.295    |

Time [Post]

|                                                 |       |      |               |       |        |       |
|-------------------------------------------------|-------|------|---------------|-------|--------|-------|
| Probiotic [Treatment] ×<br>Time [fw]            | 0.57  | 1.26 | -1.90 – 3.05  | 0.45  | 254.78 | 0.650 |
| Risk × Time [Post]                              | -1.72 | 0.76 | -3.22 – -0.23 | -2.27 | 251.41 | 0.024 |
| Risk × Time [fw]                                | -1.74 | 0.77 | -3.25 – -0.23 | -2.26 | 265.11 | 0.024 |
| (Probiotic [Treatment] ×<br>Risk) × Time [Post] | 2.28  | 0.96 | 0.40 – 4.17   | 2.39  | 253.60 | 0.018 |
| (Probiotic [Treatment] ×<br>Risk) × Time [fw]   | 1.62  | 0.97 | -0.30 – 3.54  | 1.66  | 263.89 | 0.097 |

**Random Effects**

|                      |       |
|----------------------|-------|
| $\sigma^2$           | 25.39 |
| $\tau_{00}$ Subject  | 21.72 |
| ICC                  | 0.46  |
| N <sub>Subject</sub> | 135   |

---

|              |     |
|--------------|-----|
| Observations | 394 |
|--------------|-----|

|                                                      |               |
|------------------------------------------------------|---------------|
| Marginal R <sup>2</sup> / Conditional R <sup>2</sup> | 0.072 / 0.500 |
|------------------------------------------------------|---------------|

---

**Table S21. Three-way interaction model for risky behavior in PANAS\_NEG.**

| <i>Predictors</i>                            | <b>PANAS_NEG</b>   |                   |               |                    |           |              |
|----------------------------------------------|--------------------|-------------------|---------------|--------------------|-----------|--------------|
|                                              | <i>beta coeff.</i> | <i>Std. Error</i> | <i>CI</i>     | <i>t statistic</i> | <i>df</i> | <i>p</i>     |
| (Intercept)                                  | 1.59               | 0.95              | -0.27 – 3.46  | 1.68               | 209.42    | 0.094        |
| Sex [Male]                                   | -1.25              | 1.38              | -3.99 – 1.48  | -0.91              | 128.11    | 0.365        |
| Age                                          | -0.22              | 0.07              | -0.36 – -0.08 | -3.02              | 128.63    | 0.003        |
| Probiotic [Treatment]                        | -3.62              | 1.28              | -6.15 – -1.08 | -2.81              | 220.54    | 0.005        |
| Risk                                         | 3.48               | 0.75              | 2.00 – 4.95   | 4.65               | 218.47    | <0.001       |
| Time [Post]                                  | -0.90              | 0.80              | -2.48 – 0.67  | -1.13              | 247.19    | 0.258        |
| Time [fw]                                    | -1.36              | 0.82              | -2.97 – 0.25  | -1.66              | 250.67    | 0.098        |
| Probiotic [Treatment] × Risk                 | -2.47              | 0.96              | -4.36 – -0.58 | -2.58              | 226.92    | 0.011        |
| Probiotic [Treatment] × Time [Post]          | 2.00               | 1.13              | -0.23 – 4.23  | 1.77               | 247.79    | 0.079        |
| Probiotic [Treatment] × Time [fw]            | 3.23               | 1.15              | 0.95 – 5.50   | 2.80               | 250.52    | 0.006        |
| Risk × Time [Post]                           | -0.66              | 0.66              | -1.95 – 0.64  | -1.00              | 247.19    | 0.320        |
| Risk × Time [fw]                             | -1.86              | 0.68              | -3.19 – -0.52 | -2.74              | 251.30    | <b>0.007</b> |
| (Probiotic [Treatment] × Risk) × Time [Post] | 0.06               | 0.85              | -1.60 – 1.73  | 0.07               | 248.89    | 0.942        |
| (Probiotic [Treatment] × Risk) × Time [fw]   | 1.05               | 0.87              | -0.66 – 2.77  | 1.21               | 252.45    | 0.228        |

## Random Effects

|                                    |               |
|------------------------------------|---------------|
| $\sigma^2$                         | 20.98         |
| $\tau_{00}$ Subject                | 33.61         |
| ICC                                | 0.62          |
| $N_{\text{Subject}}$               | 135           |
| Observations                       | 390           |
| Marginal $R^2$ / Conditional $R^2$ | 0.166 / 0.680 |

**Table S22. Three-way interaction model for risky behavior in SF36\_MEN.**

| <i>Predictors</i>                   | SF36_MEN           |                   |               |                    |           |          |
|-------------------------------------|--------------------|-------------------|---------------|--------------------|-----------|----------|
|                                     | <i>beta coeff.</i> | <i>Std. Error</i> | <i>CI</i>     | <i>t statistic</i> | <i>df</i> | <i>p</i> |
| (Intercept)                         | -2.03              | 1.81              | -5.60 – 1.54  | -1.12              | 220.12    | 0.264    |
| Sex [Male]                          | 5.21               | 2.61              | 0.05 – 10.38  | 2.00               | 128.93    | 0.048    |
| Age                                 | 0.44               | 0.14              | 0.17 – 0.71   | 3.23               | 128.69    | 0.002    |
| Probiotic [Treatment]               | 1.91               | 2.46              | -2.94 – 6.75  | 0.78               | 231.12    | 0.439    |
| Risk                                | -4.72              | 1.43              | -7.55 – -1.90 | -3.29              | 230.10    | 0.001    |
| Time [Post]                         | -0.47              | 1.61              | -3.65 – 2.70  | -0.29              | 252.54    | 0.770    |
| Time [fw]                           | 0.17               | 1.64              | -3.05 – 3.40  | 0.10               | 253.89    | 0.917    |
| Probiotic [Treatment] × Risk        | 1.71               | 1.84              | -1.92 – 5.34  | 0.93               | 240.21    | 0.355    |
| Probiotic [Treatment] × Time [Post] | 0.91               | 2.28              | -3.58 – 5.39  | 0.40               | 252.73    | 0.691    |

|                                                 |       |      |              |       |        |       |
|-------------------------------------------------|-------|------|--------------|-------|--------|-------|
| Probiotic [Treatment] ×<br>Time [fw]            | -0.49 | 2.31 | -5.04 – 4.05 | -0.21 | 253.88 | 0.830 |
| Risk × Time [Post]                              | 1.67  | 1.32 | -0.93 – 4.27 | 1.26  | 252.07 | 0.207 |
| Risk × Time [fw]                                | 1.48  | 1.36 | -1.19 – 4.15 | 1.09  | 254.35 | 0.277 |
| (Probiotic [Treatment] ×<br>Risk) × Time [Post] | 0.68  | 1.70 | -2.67 – 4.04 | 0.40  | 253.88 | 0.688 |
| (Probiotic [Treatment] ×<br>Risk) × Time [fw]   | 0.44  | 1.75 | -3.01 – 3.88 | 0.25  | 256.63 | 0.804 |

#### Random Effects

|                                    |               |
|------------------------------------|---------------|
| $\sigma^2$                         | 86.03         |
| $\tau_{00}$ Subject                | 116.42        |
| ICC                                | 0.58          |
| $N_{\text{Subject}}$               | 135           |
| Observations                       | 395           |
| Marginal $R^2$ / Conditional $R^2$ | 0.142 / 0.635 |



**Table S23. Three-way interaction model for risky behavior in SF36\_PHY.**

| <i>Predictors</i>                            | <b>SF36_PHY</b>    |                   |               |                    |           |          |
|----------------------------------------------|--------------------|-------------------|---------------|--------------------|-----------|----------|
|                                              | <i>beta coeff.</i> | <i>Std. Error</i> | <i>CI</i>     | <i>t statistic</i> | <i>df</i> | <i>p</i> |
| (Intercept)                                  | -0.00              | 1.20              | -2.37 – 2.36  | -0.00              | 205.89    | 0.998    |
| Sex [Male]                                   | 2.70               | 1.76              | -0.78 – 6.19  | 1.53               | 128.39    | 0.128    |
| Age                                          | 0.03               | 0.09              | -0.15 – 0.22  | 0.37               | 127.71    | 0.715    |
| Probiotic [Treatment]                        | 1.35               | 1.64              | -1.87 – 4.57  | 0.83               | 218.98    | 0.410    |
| Risk                                         | -2.69              | 0.95              | -4.57 – -0.82 | -2.84              | 215.50    | 0.005    |
| Time [Post]                                  | -0.52              | 1.00              | -2.49 – 1.46  | -0.51              | 244.46    | 0.609    |
| Time [fw]                                    | 0.07               | 1.02              | -1.94 – 2.08  | 0.07               | 245.49    | 0.945    |
| Probiotic [Treatment] × Risk                 | 1.68               | 1.22              | -0.74 – 4.09  | 1.37               | 227.59    | 0.172    |
| Probiotic [Treatment] × Time [Post]          | -0.36              | 1.43              | -3.18 – 2.46  | -0.25              | 245.01    | 0.804    |
| Probiotic [Treatment] × Time [fw]            | -2.44              | 1.45              | -5.28 – 0.41  | -1.69              | 246.32    | 0.093    |
| Risk × Time [Post]                           | 0.84               | 0.82              | -0.78 – 2.47  | 1.03               | 244.08    | 0.306    |
| Risk × Time [fw]                             | 0.18               | 0.84              | -1.48 – 1.84  | 0.22               | 245.70    | 0.829    |
| (Probiotic [Treatment] × Risk) × Time [Post] | -1.23              | 1.07              | -3.33 – 0.88  | -1.15              | 245.96    | 0.252    |
| (Probiotic [Treatment] × Risk) × Time [fw]   | -0.78              | 1.09              | -2.93 – 1.38  | -0.71              | 248.22    | 0.479    |

## Random Effects

|                                    |               |
|------------------------------------|---------------|
| $\sigma^2$                         | 32.59         |
| $\tau_{00 \text{ Subject}}$        | 55.09         |
| ICC                                | 0.63          |
| $N_{\text{Subject}}$               | 135           |
| Observations                       | 386           |
| Marginal $R^2$ / Conditional $R^2$ | 0.087 / 0.661 |

**Table S24. Three-way interaction model for risky behavior in MAIA.**

| <i>Predictors</i>                   | MAIA               |                   |              |                    |           |          |
|-------------------------------------|--------------------|-------------------|--------------|--------------------|-----------|----------|
|                                     | <i>beta coeff.</i> | <i>Std. Error</i> | <i>CI</i>    | <i>t statistic</i> | <i>df</i> | <i>p</i> |
| (Intercept)                         | -0.07              | 0.09              | -0.23 – 0.10 | -0.77              | 185.49    | 0.444    |
| Sex [Male]                          | 0.05               | 0.13              | -0.21 – 0.31 | 0.38               | 129.41    | 0.701    |
| Age                                 | 0.00               | 0.01              | -0.01 – 0.02 | 0.46               | 128.55    | 0.647    |
| Probiotic [Treatment]               | 0.12               | 0.12              | -0.11 – 0.35 | 1.05               | 192.75    | 0.294    |
| Risk                                | -0.12              | 0.07              | -0.25 – 0.02 | -1.72              | 191.95    | 0.086    |
| Time [Post]                         | -0.01              | 0.06              | -0.13 – 0.12 | -0.13              | 251.40    | 0.900    |
| Time [fw]                           | -0.06              | 0.06              | -0.19 – 0.06 | -0.99              | 252.30    | 0.325    |
| Probiotic [Treatment] × Risk        | -0.07              | 0.09              | -0.24 – 0.10 | -0.82              | 199.94    | 0.414    |
| Probiotic [Treatment] × Time [Post] | 0.00               | 0.09              | -0.18 – 0.18 | 0.01               | 251.71    | 0.992    |

|                                                 |       |      |              |       |        |       |
|-------------------------------------------------|-------|------|--------------|-------|--------|-------|
| Probiotic [Treatment] ×<br>Time [fw]            | 0.15  | 0.09 | -0.02 – 0.33 | 1.70  | 252.88 | 0.091 |
| Risk × Time [Post]                              | 0.03  | 0.05 | -0.07 – 0.13 | 0.58  | 251.10 | 0.561 |
| Risk × Time [fw]                                | 0.03  | 0.05 | -0.07 – 0.14 | 0.59  | 252.60 | 0.553 |
| (Probiotic [Treatment] ×<br>Risk) × Time [Post] | -0.07 | 0.07 | -0.20 – 0.07 | -0.97 | 253.07 | 0.335 |
| (Probiotic [Treatment] ×<br>Risk) × Time [fw]   | -0.03 | 0.07 | -0.17 – 0.10 | -0.47 | 258.25 | 0.639 |

#### Random Effects

|                                    |               |
|------------------------------------|---------------|
| $\sigma^2$                         | 0.13          |
| $\tau_{00}$ Subject                | 0.32          |
| ICC                                | 0.70          |
| $N_{\text{Subject}}$               | 135           |
| Observations                       | 394           |
| Marginal $R^2$ / Conditional $R^2$ | 0.118 / 0.740 |

**Table S25. Three-way interaction model for risky behavior in FFMQ.**

| <i>Predictors</i>                            | FFMQ               |                   |               |                    |           |          |
|----------------------------------------------|--------------------|-------------------|---------------|--------------------|-----------|----------|
|                                              | <i>beta coeff.</i> | <i>Std. Error</i> | <i>CI</i>     | <i>t statistic</i> | <i>df</i> | <i>p</i> |
| (Intercept)                                  | -1.53              | 2.37              | -6.20 – 3.14  | -0.65              | 179.91    | 0.519    |
| Sex [Male]                                   | 3.59               | 3.62              | -3.58 – 10.75 | 0.99               | 129.03    | 0.324    |
| Age                                          | 0.35               | 0.19              | -0.03 – 0.72  | 1.82               | 128.87    | 0.071    |
| Probiotic [Treatment]                        | 2.26               | 3.19              | -4.03 – 8.54  | 0.71               | 185.79    | 0.480    |
| Risk                                         | -4.39              | 1.86              | -8.06 – -0.71 | -2.35              | 185.80    | 0.020    |
| Time [Post]                                  | -0.31              | 1.67              | -3.59 – 2.98  | -0.18              | 253.30    | 0.854    |
| Time [fw]                                    | -0.26              | 1.69              | -3.60 – 3.07  | -0.16              | 254.11    | 0.876    |
| Probiotic [Treatment] × Risk                 | -0.35              | 2.35              | -4.99 – 4.29  | -0.15              | 185.78    | 0.882    |
| Probiotic [Treatment] × Time [Post]          | 0.29               | 2.35              | -4.33 – 4.92  | 0.12               | 253.30    | 0.901    |
| Probiotic [Treatment] × Time [fw]            | 0.89               | 2.38              | -3.79 – 5.58  | 0.38               | 253.98    | 0.707    |
| Risk × Time [Post]                           | 0.11               | 1.37              | -2.58 – 2.80  | 0.08               | 253.02    | 0.938    |
| Risk × Time [fw]                             | -0.99              | 1.40              | -3.75 – 1.77  | -0.71              | 254.39    | 0.480    |
| (Probiotic [Treatment] × Risk) × Time [Post] | 0.15               | 1.72              | -3.24 – 3.55  | 0.09               | 253.03    | 0.929    |
| (Probiotic [Treatment] × Risk) × Time [fw]   | 1.14               | 1.77              | -2.36 – 4.63  | 0.64               | 254.46    | 0.522    |

Random Effects

|                                                      |               |
|------------------------------------------------------|---------------|
| $\sigma^2$                                           | 91.90         |
| $\tau_{00}$ Subject                                  | 249.59        |
| ICC                                                  | 0.73          |
| N Subject                                            | 135           |
| Observations                                         | 396           |
| Marginal R <sup>2</sup> / Conditional R <sup>2</sup> | 0.141 / 0.769 |
