# Supplementary material for: Psychobiotic Effects on Anxiety Are Modulated by Lifestyle Behaviors: A Randomized Placebo-Controlled Trial on Healthy Adults
Source: Nutrients. 2023 Mar 31;15(7):1706. doi: 10.3390/nu15071706 (PMC10096963; doi:10.3390/nu15071706)
Supplement: Supplementary file 1 [file nutrients-15-01706-s001.zip]

Archive with 5 entries (5 files):
- Figure S1.jpg
- Figure S2.jpg
- Figure S3.jpg
- Supplementary material S1_REV.pdf
- Supplementary material S2_REV.pdf
